# Supplementary material for: The migration of Cu species over Cu–SAPO-34 and its effect on NH3oxidation at high temperature
Source: Royal Society of Chemistry journal article supplement (doi:10.1039/c4cy00451e), 2014-05-08
Supplement: c4cy00451e1.pdf [file c4cy00451e1.pdf]

## Supplementary information

### The migration of Cu species over Cu-SAPO-34 and its effect on NH<sub>3</sub> oxidation at high temperature

Jun Wang <sup>a</sup>, Yu Huang <sup>a</sup>, Tie Yu <sup>a</sup>, Shaochun Zhu <sup>a</sup>, Meiqing Shen <sup>a, b\*</sup>, Wei Li<sup>c</sup>, Jianqiang Wang <sup>a\*</sup>

<sup>a</sup> Key Laboratory for Green Chemical Technology of State Education Ministry,  
School of Chemical Engineering & Technology, Tianjin University, Tianjin 300072, PR China

<sup>b</sup> State Key Laboratory of Engines, Tianjin University, Tianjin 300072, PR China

<sup>c</sup> General Motors Global Research and Development, Chemical Sciences and Materials Systems  
Lab, 3500 Mound Road, Warren, MI 48090, USA

\* Corresponding author: Jianqiang Wang

Postal address:

School of Chemical Engineering and Technology, Tianjin University, 92 Weijin Road, Nankai  
District, Tianjin 300072, China

Email: jianqiangwang@tju.edu.cn

Tel. / Fax. : (+86) 22-27892301

## 1 NH<sub>3</sub>-TPD

Temperature programmed desorption (NH<sub>3</sub>-TPD) experiments were performed in the same reactor for the NH<sub>3</sub> oxidation activity test and the same sample weight was packed. Prior to the experiments, the catalysts were pre-oxidized at 500 °C for 30 min in 5% O<sub>2</sub>/N<sub>2</sub>, and then 500 ppm NH<sub>3</sub>/N<sub>2</sub> was purged until the outlet NH<sub>3</sub> concentration was stable at 80 °C. After that, the catalysts were purged with N<sub>2</sub> to remove any weakly absorbed NH<sub>3</sub> at 80 °C. When NH<sub>3</sub> concentration was lower than 5 ppm, the catalysts were heated from 80 °C to 550 °C at a ramping rate of 10 °C/min. The outlet NH<sub>3</sub> concentrations were analysed by a Fourier Transform Infrared (FTIR) spectrometer (MKS-2030) which equipped with a 5.11 m gas cell.

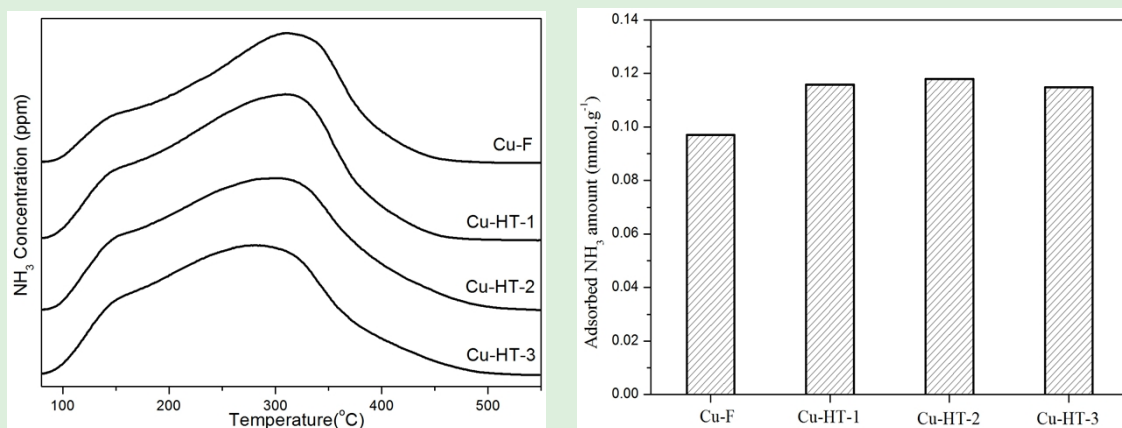

**Fig. S1** The NH<sub>3</sub>-TPD profiles and the adsorbed NH<sub>3</sub> content for the Cu/SAPO-34 catalysts

## 2 Mass Diffusion Effect

The Cu-HT-1 catalyst was used as an example to rule out the diffusion limitations. Five volume hourly space velocities (VHSV) were used to rule out the external mass transfer limitation. Fig. S2 presented the variation in NH<sub>3</sub> oxidation rate as a function of VHSV (1,920,000 - 4,800,000 h<sup>-1</sup>) at 400 °C. The rate of NH<sub>3</sub> conversion initially increased with the VHSV and then leveled off at VHSV > 2,880,000 h<sup>-1</sup>, indicating that the NH<sub>3</sub> conversion rate was not affected by the external mass transfer limitation when VHSV was higher than 2,880,000 h<sup>-1</sup>. We chose the 3,600,000 h<sup>-1</sup> as

the experiment condition to ensure that the reaction is free from external mass transfer limitation. The internal diffusion limitation was examined by measuring the rates using the samples with five different particle sizes at 400 °C, as shown in Fig. S3. For the sample with the particle diameters within the range of 120 - 300  $\mu\text{m}$ , the measured rates were almost constant, indicating the  $\text{NH}_3$  conversion rates of these samples could not be affected by the intraparticle mass diffusion. The sample with 150 - 180  $\mu\text{m}$  diameters (80 - 100 mesh) was chosen. However, the intracrystalline diffusion also influenced the most reactions over zeolites. Both the intraparticle and intracrystal diffusions could yield internal mass transfer effect, but the intracrystal diffusions could not be totally ruled out by measuring the rates of one catalyst with different particle sizes.

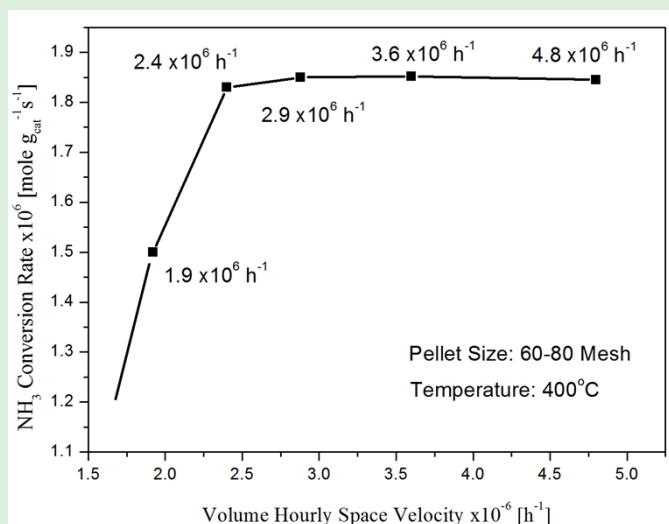

**Fig. S2**  $\text{NH}_3$  conversion rate of Cu-HT-1 catalyst for  $\text{NH}_3$  oxidation reaction as a function of VHSV/  $\text{h}^{-1}$  at 400 °C.

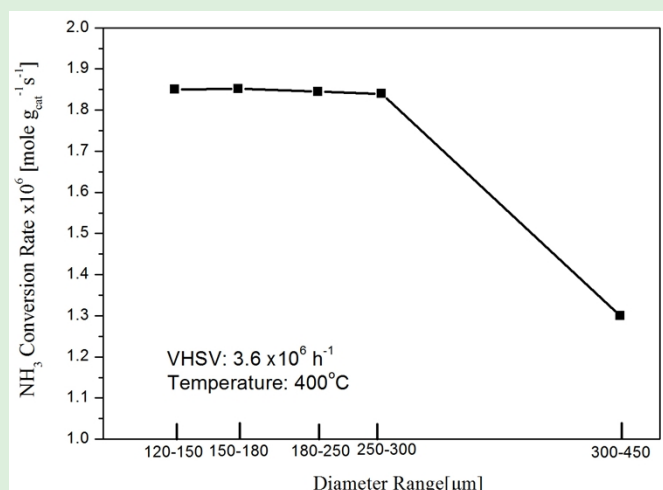

**Fig. S3** NH<sub>3</sub> conversion rate of Cu-HT-1 catalyst for NH<sub>3</sub> oxidation reaction as a function of particle size at 400 °C.

### 3 DRIFTS of NH<sub>3</sub> adsorption and NH<sub>3</sub> oxidation

DRIFTS was performed on Nicolet 6700 FTIR equipped with a MCT detector at a resolution of 1 cm<sup>-1</sup>. The total flow rate was 100 mL·min<sup>-1</sup>. Before the experiments, the samples were pretreated with 10% O<sub>2</sub> in He at 500 °C for 30 min and the background spectra were collected under He at the test temperature. For the adsorption experiments, the pre-treated samples were exposed to 500 ppm NH<sub>3</sub> for 1 h at 410 °C followed by the N<sub>2</sub> purge. After the spectra was stable, 5% O<sub>2</sub> was introduced, and the spectra was collected every 2 min during the experiment.

As shown in Fig. S4, the strong band at 1489 cm<sup>-1</sup> was related to asymmetric vibration of NH<sub>4</sub><sup>+</sup> groups. The bands at 3356 cm<sup>-1</sup>, 3275 cm<sup>-1</sup> were assigned as N-H stretching of NH<sub>4</sub><sup>+</sup> ions H-bonded to lattice oxygens<sup>1,2</sup>. It was seen that the NH<sub>3</sub> consumption rate for Cu-HT samples was faster than Cu-F sample from the DRIFTS result. It was worth to note that the CuO was the active site for the NH<sub>3</sub> oxidation, and the Cu<sup>2+</sup> was the active sites for SCR reaction. And the NH<sub>3</sub> oxidation on Cu/SAPO-34 contained two steps: the NO generation on CuO sites and NO further consumption on Cu<sup>2+</sup> sites. From our previous studies, the CuO presented no acidity and could not adsorb NH<sub>3</sub> from DRIFTS results. The peaks at 3279 and 1489 cm<sup>-1</sup> were ascribed to the adsorbed NH<sub>3</sub> species on the

Brønsted acid sites. And the adsorbed  $\text{NH}_3$  species benefited the SCR reaction than  $\text{NH}_3$  oxidation. The gas phase  $\text{NH}_3$  could generate NO on CuO sites, then the generated NO was further consumed on the pre-saturated  $\text{Cu}^{2+}$  sites by  $\text{NH}_3$ . In Fig. S4a, the lower  $\text{NH}_3$  conversion rate was induced by the less  $\text{Cu}^{2+}$  sites in Cu-F sample, while the faster rate for Cu-HT sample in Figure S4b was due to its more  $\text{Cu}^{2+}$  sites. Consequently, this result was consistent with the  $\text{NH}_3$  conversion and NO generation in Figure 10, and further confirmed the  $\text{NH}_3$  oxidation mechanism in Scheme 1.

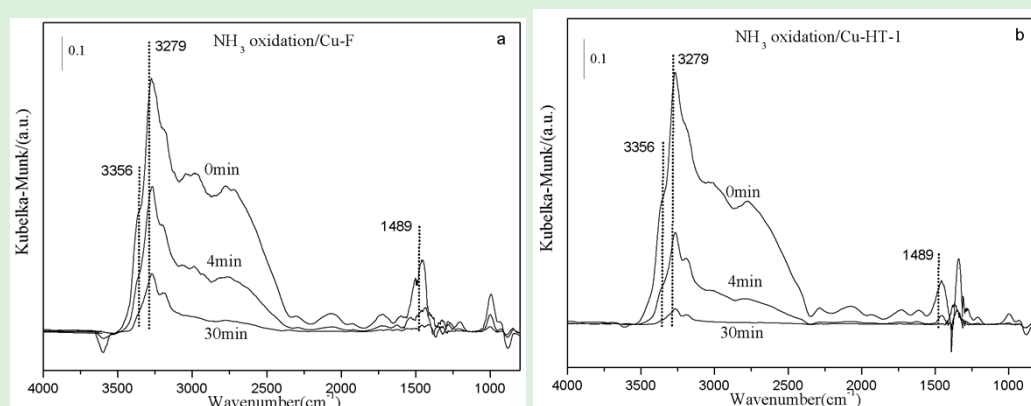

**Fig. S4** The DRIFTS spectra of Cu-F (a) and Cu-HT-1 (b) for  $\text{NH}_3$  oxidation reaction at 410 °C.

**Table S1** The consuming rate of the adsorbed  $\text{NH}_3$  in the  $\text{NH}_3$  oxidation

| Wavenumber            | Sample  | Consuming Rate |        |        |
|-----------------------|---------|----------------|--------|--------|
|                       |         | 0 min          | 4 min  | 30 min |
| 3356 $\text{cm}^{-1}$ | Cu-F    | 0%             | 42.9%  | 76.3%  |
|                       | Cu-HT-1 | 0%             | 76.33% | 94.1%  |
| 3279 $\text{cm}^{-1}$ | Cu-F    | 0%             | 46.8%  | 85.2%  |
|                       | Cu-HT-1 | 0%             | 74.1%  | 96.4%  |
| 1489 $\text{cm}^{-1}$ | Cu-F    | 0%             | 59.5%  | 88.7%  |
|                       | Cu-HT-1 | 0%             | 88.7%  | 97.3%  |

#### 4 Correlation between the pre-exponential factor and the CuO amount

The pre-exponential factor ( $A$ ), which meant active site amount for  $\text{NH}_3$  oxidation, was calculated based on the kinetic data in Fig. 12. The result in Table S2 showed that Cu-HT samples owned the similar “ $A/\text{CuO}$  amount” value, which indicated that CuO might be the  $\text{NH}_3$  oxidation active sites of the hydrothermally treated samples. However, an interesting phenomenon was that the “ $A/\text{CuO}$  amount” value of Cu-F sample was much higher than others. It might be because that the  $\text{NH}_3$ ,  $\text{N}_2$

and O<sub>2</sub> molecules had kinetic diameters very close to the openings of the chabazite structures, and it was more difficult for them to react with the CuO species of the Cu-HT samples than the Cu-F sample whose most CuO was on the surface.

**Table S2** The pre-exponential factor (A) and its correlation with CuO amount

| Catalysts | ln A  | A      | A / CuO amount (mol <sup>-1</sup> ) |
|-----------|-------|--------|-------------------------------------|
| Cu-F      | 4.892 | 133.22 | 0.6547                              |
| Cu-HT-1   | 3.707 | 40.90  | 0.3064                              |
| Cu-HT-2   | 3.446 | 31.36  | 0.3007                              |
| Cu-HT-3   | 3.091 | 22.01  | 0.3130                              |

### Crystal structure model of Cu/SAPO-34

The crystal structure model of Cu/SAPO-34 was shown in Scheme S1. SAPO-34 was a zeolite with the Chabazite (CHA) framework structure. And CHA structure can be described as an ABC sequence of double 6-rings of tetrahedra linked together through single 4-rings. The resulting framework is characterized by a three dimensional channel system confined by 8-membered rings. The channel intersections give rise to the so-called chabazite cage<sup>3</sup>.

In our article, the CuO species initially existed on the external surface of the SAPO-34, and they converted into the isolated Cu<sup>2+</sup> in the center of the hexagonal prism and nanosized CuO in the cavity after the hydrothermal treatment, as shown in Scheme S1.

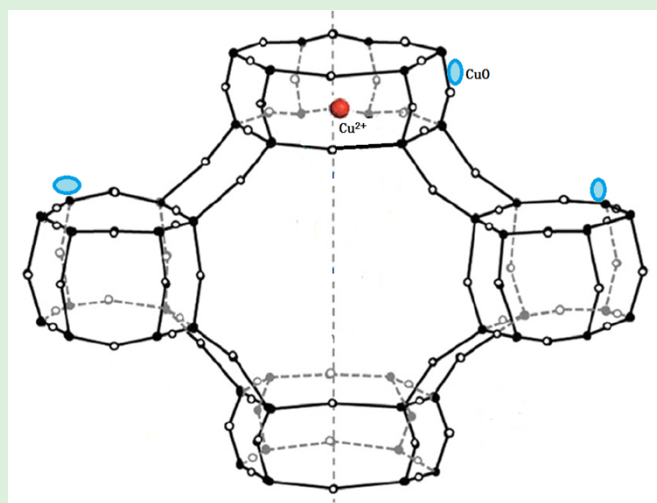

**Scheme S1.** Skeleton structure diagram of the unit cell of the Cu-HT samples.

Each solid circle represents an Al, P, or Si and the open circles represent oxygen.

## 6 XPS results of the Cu/SAPO-34 catalysts

The X-ray photoelectron spectroscopy (XPS) analysis for Cu-F and Cu-HT-3 was conducted to further understand the Cu species on the samples surface. It was carried out on a PHI-1600 ESCA system with Mg K $\alpha$  source operating at 250 W. The binding energy was calibrated internally by the carbon deposit C 1s binding energy (BE) at 284.6 eV.

It was known that CuO and Cu<sup>2+</sup> species of the fresh impregnated sample intended to exist on the support surface, while the Cu species of the hydrothermally treated samples mainly enriched in the bulk phase. The detection depth of the XPS analysis was about 5 nm, so the XPS signal intensity of Cu-F was higher than Cu-HT-1 as shown in Fig. S5 and it was not suitable to compare between different samples. As shown in Fig.S5, the binding energy of 934.2 eV for the Cu 2p<sub>3/2</sub> peak was the characteristic of Cu<sup>2+</sup> species, while lower binding energy of 932.1 eV was the characteristic of Cu<sup>+</sup><sup>47</sup>. No obvious Cu<sup>+</sup> XPS signal was detected for the Cu-F sample, but there was a shoulder peak at BE=932.1 eV for the Cu-HT-3 sample. And the ratio of Cu<sup>+</sup>/Cu<sup>2+</sup> for the Cu-HT-3 was nearly 0.06 according to the integration area of Cu<sup>+</sup> and Cu<sup>2+</sup> peaks. Combining CO-DRIFTS, H<sub>2</sub>-TPR and XPS results, it could be concluded that the Cu<sup>+</sup>/Cu<sup>2+</sup> ratios of the Cu/SAPO-34 catalysts were from 0 to 0.06 (as Table S3), which indicated that the Cu<sup>+</sup> amount of the samples in our study was very little.

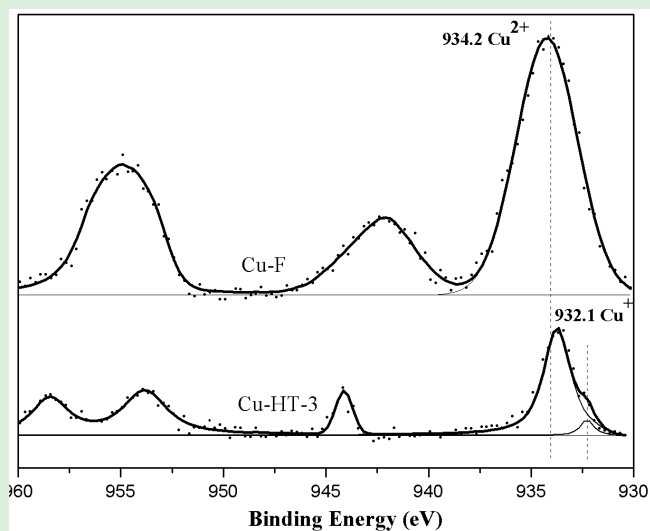

**Fig. S5** The XPS spectra for the Cu-SAPO-34 catalysts.

**Table S3** The Cu<sup>+</sup>/Cu<sup>2+</sup> ratios of the Cu/SAPO-34.

| Sample  | Cu <sup>+</sup> /Cu <sup>2+</sup> Molar Ratio <sup>a</sup> |
|---------|------------------------------------------------------------|
| Cu-F    | 0.007                                                      |
| Cu-HT-1 | 0.022                                                      |
| Cu-HT-2 | 0.029                                                      |
| Cu-HT-3 | 0.059                                                      |

<sup>a</sup> analyzed by CO-DRIFTS and XPS

## References:

1. G. V. A. Martins, G. Berlier, C. Bisio, S. Coluccia, H. O. Pastore and L. Marchese, *The Journal of Physical Chemistry C*, 2008, **112**, 7193.
2. A. Zecchina, L. Marchese, S. Bordiga, C. Pazè and E. Gianotti, *The Journal of Physical Chemistry B*, 1997, **101**, 10128.
3. L. Leardini, S. Quartieri and G. Vezzalini, *Microporous and Mesoporous Materials*, 2010, **127**, 219.
4. C. Ge, L. Liu, X. Yao, C. Tang, F. Gao and L. Dong, *Catalysis Science & Technology*, 2013, **3**, 1547.
5. L. Wang, J. R. Gaudet, W. Li and D. Weng, *Journal of Catalysis*, 2013, **306**, 68.



6. R. Zhang, D. Shi, Y. Zhao, B. Chen, J. Xue, X. Liang and Z. Lei, *Catalysis Today*, 2011, **175**, 26.
7. L. Liu, Z. Yao, B. Liu and L. Dong, *Journal of Catalysis*, 2010, **275**, 45.
